# Supplementary material for: Sets of serum exosomal microRNAs as candidate diagnostic biomarkers for Kawasaki disease
Source: PubMed Central journal article supplement (PMC5357789; doi:10.1038/srep44706), 2017-03-20
Supplement: srep44706-s1.pdf [file srep44706-s1.pdf]

# Sets of serum exosomal microRNAs as candidate diagnostic biomarkers for Kawasaki disease

Hong-Ling Jia<sup>1,†</sup>, Chao-Wu Liu<sup>3,†</sup>, Li Zhang<sup>2,\*</sup>, Wei-Jun Xu<sup>5,†</sup>, Xue-Juan Gao<sup>1</sup>, Jun Bai<sup>4</sup>, Yu-Fen Xu<sup>2</sup>, Ming-Guo Xu<sup>6,\*</sup> and Gong Zhang<sup>1,\*</sup>

Table S1

Coronary artery changes in 5 untreated and 5 intravenous immunoglobulin-treated Kawasaki disease patients (these samples were used for miRNA microarray analysis)

| Patient    | Age   | Sex    | Treatment | Coronary Change       |
|------------|-------|--------|-----------|-----------------------|
| Patient 5  | 6M    | male   | - IVIG    | LCA=3.5 mm RCA=2.7 mm |
| Patient 14 | 1Y10M | female | - IVIG    | LCA=3.3 mm RCA=3.0 mm |
| Patient 19 | 1Y5M  | female | - IVIG    | LCA=3.2 mm RCA=2.3 mm |
| Patient 34 | 1Y7M  | male   | - IVIG    | LCA=3.1 mm RCA=3.2 mm |
| Patient 43 | 7M    | male   | - IVIG    | LCA=2.4 mm RCA=3.0 mm |
| Patient 4  | 1Y4M  | male   | + IVIG    | LCA=2.8 mm RCA=2.0 mm |
| Patient 10 | 2Y1M  | female | + IVIG    | LCA=2.5 mm RCA=2.8 mm |
| Patient 30 | 1Y5M  | female | + IVIG    | LCA=3.0 mm RCA=2.3 mm |
| Patient 35 | 1Y9M  | male   | + IVIG    | LCA=2.3 mm RCA=3.0 mm |
| Patient 40 | 5M    | male   | + IVIG    | LCA=2.2 mm RCA=2.4 mm |

Y = year; M = month; IVIG = intravenous immunoglobulin; -IVIG = KD patients before IVIG therapy; +IVIG = KD patients after IVIG therapy; LCA = left coronary artery; RCA = right coronary artery

Table S2

Coronary artery changes in 10 untreated and 10 intravenous immunoglobulin-treated Kawasaki disease patients (these samples were used for validation of miRNA microarray analysis results by real-time quantitative PCR)

| Patient        | Age   | Sex    | Treatment | Coronary Change                     |
|----------------|-------|--------|-----------|-------------------------------------|
| Patient 0      | 1Y2M  | female | - IVIG    | LCA=3.3 mm                          |
| Patient 1      | 2Y10M | male   | - IVIG    | LCA=2.4 mm RCA=2.3 mm               |
| Patient 25     | 1Y10M | male   | - IVIG    | LCA=3.0 mm RCA=2.1 mm               |
| Patient 50     | 10M   | male   | - IVIG    | LCA=2.3 mm RCA=2.4 mm               |
| Patient 52     | 3Y    | male   | - IVIG    | LCA=3.2 mm RCA=2.6 mm               |
| Patient 23     | 2Y4M  | male   | - IVIG    | LCA=3.0 mm                          |
| Patient 73     | 1Y    | female | - IVIG    | LCA=3.0 mm RCA=2.5 mm               |
| Patient 88     | 1Y11M | male   | - IVIG    | LCA=3.2 mm RCA=3.0 mm               |
| Patient 111(0) | 1Y3M  | male   | - IVIG    | Coronary artery intimal hyperplasia |
| Patient 111(2) | 1Y3M  | male   | - IVIG    | Coronary artery intimal hyperplasia |
| Patient 17     | 1Y8M  | male   | + IVIG    | LCA=2.7 mm RCA=2.4 mm               |
| Patient 21     | 1Y4M  | male   | + IVIG    | LCA=2.5 mm RCA=2.1 mm               |
| Patient 29     | 10M   | female | + IVIG    | LCA=3.3 mm RCA=2.4 mm               |
| Patient 64     | 3Y    | male   | + IVIG    | LCA=2.6mm RCA=2.2mm                 |
| Patient 65     | 11M   | male   | + IVIG    | LCA=2.3 mm RCA=2.2 mm               |
| Patient 66     | 8M    | female | + IVIG    | LCA=2.5 mm RCA=2.9 mm               |
| Patient 74     | 11M   | male   | + IVIG    | LCA=2.3 mm RCA=2.2 mm               |
| Patient 79     | 1Y    | male   | + IVIG    | LCA=2.5 mm RCA=2.0 mm               |
| Patient 89     | 1Y    | female | + IVIG    | LCA=2.8 mm RCA=2.9 mm               |
| Patient 111(2) | 1Y3M  | male   | + IVIG    | Coronary artery intimal hyperplasia |

Y = year; M = month; KD = Kawasaki disease; IVIG = intravenous immunoglobulin; -IVIG = KD patients before IVIG therapy; +IVIG = KD patients after IVIG therapy; LCA = left coronary artery; RCA = right coronary artery

Table S3

Coronary artery changes in 10 Kawasaki disease patients before and after intravenous immunoglobulin therapy (these samples were used for validation of miRNA microarray analysis results by real-time quantitative PCR)

| Patient     | Age   | Sex    | Treatment | Coronary Change           |
|-------------|-------|--------|-----------|---------------------------|
| Patient 3   | 11M   | male   | - IVIG    | LCA=3.1 mm RCA=3.0 mm     |
|             |       |        | + IVIG    | LCA=2.7 mm RCA=2.6 mm     |
| Patient 36  | 2Y11M | female | - IVIG    | LCA=4.2 mm                |
|             |       |        | + IVIG    | LCA=3.3 mm RCA=2.4 mm     |
| Patient 63  | 10M   | male   | - IVIG    | LCA=5.2 mm RCA=7.8 mm CAA |
|             |       |        | + IVIG    | LCA=5.0 mm RCA=7.6 mm CAA |
| Patient 71  | 2Y    | male   | - IVIG    | LCA=2.5 mm RCA=2.4 mm     |
|             |       |        | + IVIG    | LCA=2.5 mm RCA=2.3 mm     |
| Patient 80  | 1Y    | male   | - IVIG    | LCA=2.6 mm RCA=2.0 mm     |
|             |       |        | + IVIG    | LCA=2.4 mm RCA=1.9 mm     |
| Patient 102 | 5Y    | male   | - IVIG    | LCA=3.3 mm RCA=3.7 mm     |
|             |       |        | + IVIG    | LCA=3.1 mm RCA=2.9 mm     |
| Patient 104 | 2M    | male   | - IVIG    | LCA=3.1 mm RCA=2.5 mm     |
|             |       |        | + IVIG    | LCA=3.0 mm RCA=2.2 mm     |
| Patient 125 | 1Y10M | female | - IVIG    | LCA=3.3 mm RCA=2.3 mm     |
|             |       |        | + IVIG    | LCA=3.0 mm RCA=2.2 mm     |
| Patient 129 | 1Y7M  | male   | - IVIG    | LCA=3.2 mm RCA=3.1 mm     |
|             |       |        | + IVIG    | LCA=2.9 mm RCA=2.8 mm     |
| Patient 133 | 1Y4M  | female | - IVIG    | LCA=3.2 mm RCA=2.0 mm     |
|             |       |        | + IVIG    | LCA=2.8 mm RCA=2.0 mm     |

Y = year; M = month; KD = Kawasaki disease; IVIG = intravenous immunoglobulin; -IVIG = KD patients before IVIG therapy; +IVIG = KD patients after IVIG therapy; LCA = left coronary artery; RCA = right coronary artery; CAA = coronary artery aneurysm

Table S4

Coronary artery changes in 54 Kawasaki disease patients before IVIG therapy (these samples were used for validation of the biomarker candidates for Kawasaki disease diagnosis by real-time quantitative PCR)

| Patient     | Age  | Sex    | Diagnosis | Coronary Change                     |
|-------------|------|--------|-----------|-------------------------------------|
| Patient 32  | 3Y   | male   | KD        | LCA=2.7 mm RCA=2.3 mm               |
| Patient 59  | 8M   | female | KD        | LCA=2.0 mm RCA=2.6 mm               |
| Patient 101 | 2Y6M | male   | KD        | LCA=2.4mm RCA=2.4mm                 |
| Patient 105 | 1Y3M | male   | KD        | Coronary artery intimal hyperplasia |
| Patient 106 | 2Y7M | female | KD        | Coronary artery intimal hyperplasia |
| Patient 114 | 2Y4M | male   | KD        | Coronary artery intimal hyperplasia |
| Patient 116 | 3M   | male   | KD        | Coronary artery intimal hyperplasia |
| Patient 119 | 2Y2M | female | KD        | Coronary artery intimal hyperplasia |
| Patient 123 | 5M   | male   | KD        | LCA=3.5 mm RCA=2.2 mm               |
| Patient 129 | 1Y7M | male   | KD        | LCA=3.2 mm RCA=3.1 mm               |
| Patient 132 | 2Y2M | male   | KD        | LCA=2.6mm RCA=2.2                   |
| Patient 135 | 1Y1M | female | KD        | Coronary artery intimal hyperplasia |
| Patient 136 | 8M   | male   | KD        | Coronary artery intimal hyperplasia |
| Patient 140 | 2Y1M | female | KD        | LCA=3.0 mm RCA=3.1 mm               |
| Patient 143 | 3M   | female | KD        | Coronary artery intimal hyperplasia |
| Patient 145 | 7Y   | male   | KD        | Coronary artery intimal hyperplasia |
| Patient 147 | 2Y4M | male   | KD        | Coronary artery intimal hyperplasia |
| Patient 149 | 2Y2M | male   | KD        | Coronary artery intimal hyperplasia |
| Patient 150 | 6M   | male   | KD        | Coronary artery intimal hyperplasia |
| Patient 151 | 1Y1M | male   | KD        | LCA=2.9 mm RCA=2.1 mm               |
| Patient 171 | 4M   | male   | KD        | LCA=3.3 mm RCA=2.8 mm               |
| Patient 172 | 2Y6M | male   | KD        | LCA=3.7 mm RCA=3.9 mm               |
| Patient 173 | 2M   | male   | KD        | LCA=2.6 mm RCA=2.1 mm               |
| Patient 174 | 1Y1M | male   | KD        | LCA=3.2 mm RCA=2.5 mm               |
| Patient 176 | 3M   | female | KD        | LCA=2.3 mm RCA=1.8 mm               |
| Patient 177 | 1Y1M | male   | KD        | LCA=2.8 mm RCA=2.4 mm               |

|              |       |        |    |                                     |            |
|--------------|-------|--------|----|-------------------------------------|------------|
| Patient 178  | 4Y    | male   | KD | LCA=3.8 mm                          | RCA=2.7 mm |
| Patient 179  | 4M    | male   | KD | LCA=3.6 mm                          | RCA=2.9 mm |
| Patient 181  | 2Y7M  | male   | KD | LCA=2.8 mm                          | RCA=3.7 mm |
| Patient 182  | 3M    | female | KD | LCA=3.5 mm                          | RCA=3.9 mm |
| Patient 183  | 5Y    | female | KD | LCA=3.1 mm                          |            |
| Patient 186  | 10Y   | male   | KD | LCA=4.4 mm                          | RCA=4.2 mm |
| Patient 187  | 3Y    | male   | KD | LCA=3.5 mm                          | RCA=3.6 mm |
| Patient 188  | 7M    | male   | KD | LCA=2.5 mm                          | RCA=2.0 mm |
| Patient 189  | 4Y    | female | KD | LCA=3.1 mm                          | RCA=2.2 mm |
| Patient 190  | 7M    | male   | KD | LCA=3.0 mm                          | RCA=2.4 mm |
| Patient 191  | 2Y8M  | male   | KD | LCA=3.9 mm                          |            |
| Patient 212  | 1Y3M  | male   | KD | LCA=3.2mm                           | RCA=2.1mm  |
| Patient 213  | 3Y    | male   | KD | LCA=3.8mm                           | RCA=2.3mm  |
| Patient 215  | 1Y1M  | male   | KD | LCA=3.2mm                           | RCA=2.0mm  |
| Patient 218  | 1Y11M | male   | KD | LCA=6.8mm                           | RCA=4.7mm  |
| Patient 229  | 11M   | male   | KD | LCA=3.7mm                           | RCA=2.0mm  |
| Patient 232  | 1Y10M | male   | KD | LCA=3.3mm                           | RCA=2.0mm  |
| Patient 233  | 1Y7M  | male   | KD | LCA=2.8mm                           | RCA=2.5mm  |
| Patient 234  | 4Y    | male   | KD | LCA=4.0mm                           | RCA=3.6mm  |
| Patient 236  | 1Y1M  | male   | KD | LCA=3.5mm                           | RCA=2.2mm  |
| Patient 237  | 7M    | male   | KD | LCA=2.7mm                           |            |
| Patient 238  | 1Y2M  | male   | KD | LCA=3.0mm                           | RCA=2.2mm  |
| Patient 239  | 1Y8M  | male   | KD | LCA=2.7mm                           | RCA=3.0mm  |
| Patient 2-10 | 1Y6M  | male   | KD | Coronary artery intimal hyperplasia |            |
| Patient 2-12 | 1Y9M  | female | KD | Coronary artery intimal hyperplasia |            |
| Patient 2-14 | 1Y8M  | male   | KD | Coronary artery intimal hyperplasia |            |
| Patient 2-15 | 1Y    | female | KD | Coronary artery intimal hyperplasia |            |
| Patient 2-16 | 2Y8M  | male   | KD | Coronary artery intimal hyperplasia |            |

Y = year; M = month; KD = Kawasaki disease; IVIG = intravenous immunoglobulin; LCA = left coronary artery; RCA = right coronary artery

Table S5

The list of All RT-PCR primer sequences (5'-3')

| <i>miRNA</i>     | <i>Reverse transcription primers</i>               |                            |
|------------------|----------------------------------------------------|----------------------------|
| hsa-miR-4436b-5p | GTCGTATCCAGTGCTGGGTCCGAGTGATTCGCACTGGATACGACGGCAGG |                            |
| hsa-miR-671-5p   | GTCGTATCCAGTGCTGGGTCCGAGTGATTCGCACTGGATACGACCTCCAG |                            |
| hsa-miR-1246     | CTCAACTGGTGTCGTGGAGTCGGCAATTCAGTTGAGCCTGCTCC       |                            |
| hsa-miR-197-3p   | CTCAACTGGTGTCGTGGAGTCGGCAATTCAGTTGAGGCTGGGTG       |                            |
| <i>miRNA</i>     | <i>qPCR forward primer</i>                         | <i>qPCR reverse primer</i> |
| hsa-miR-4436b-5p | AGCCCGTCCACTTCTGCC                                 | CAGTGCTGGGTCCGAGTGA        |
| hsa-miR-671-5p   | GCCGAGAGGAAGCCCTGG                                 | CAGTGCTGGGTCCGAGTGA        |
| hsa-miR-1246     | ACACTCCAGCTGGGAATGGATTTTTGGAGC                     | CTCAACTGGTGTCGTGGA         |
| hsa-miR-197-3p   | ACACTCCAGCTGGGTTCACCACCTTCTCCACC                   | CTCAACTGGTGTCGTGGA         |
